# Supplementary material for: Metabolic rerouting via SCD1 induction impacts X-linked adrenoleukodystrophy
Source: JCI journal article supplement (doi:10.1172/jci142500), 2021-03-09
Supplement: sd1 [file 1]

## Supplementary Data – Methods

### Zebrafish RNA extraction and qRT-PCR

qRT-PCR reactions were performed with the following primers: (scd forward qprimer) 5'-ATCCCGACGCTCCTCAGATA-3', (scd reverse qprimer) 5'-GTGGTAGCCTTCACCTATAGCA-3', (scdb forward qprimer) 5'-CCCTCATATGGACGGGAGTG-3', (scdb reverse qprimer) 5'-ATCCGTAATGGCAGTGAGGC-3', (abcd2 forward qprimer) 5'-TCACCGGAAGGGCTACCT-3', (abcd2 reverse qprimer) 5'-GCTGCTTCATCTCCACCTTGT-3', (mbp forward qprimer) 5'-AGGGAAAGAGACCCCACCAC-3', (mbp reverse qprimer) 5'-GAGGAGAGGACACAAAGCTCC-3', (mpz forward qprimer) 5'-TACCGTCCAGATGGGGCTAA-3', (mpz reverse qprimer) 5'-ACTCCAGGCGGTTTTGGAAT-3', (plp1a forward qprimer) 5'-GGTCTTGGCTCTGCTCACAT-3', (plp1a reverse qprimer) 5'-CCGTGGACTGATCCCTTTCC-3', (elov11b forward qprimer) 5'-TCAGGACTCAAGAGGAGGCA-3', (elov11b reverse qprimer) 5'-CTTCAACCGCGGGTCTCTG-3', (elov16 forward qprimer) 5'-ACTTGCCGCCTTCAGTATATTT-3' and (elov16 reverse qprimer) 5'-AGCATAAGCCCAGAACTTGCT-3' with the following conditions; 50°C for 2 min, 95 for 5 min followed by 39 cycles of 95°C for 15s, 60°C for 15s, and 72 for 15s, followed by a final melt-curve step ramping in temperature between 60°C and 95°C.

## Chemicals and Antibodies

Methyl esters of C16:0 (meC16:0) and C18:0 (meC18:0) were obtained from Sigma Aldrich. Methyl esters of C20:0 (meC20:0), C22:0 (meC22:0), C24:0 (meC24:0), C16:1 (meC16:1), C18:1 (meC18:1), C20:1 (meC20:1), C22:1 (meC22:1) and C24:1 (meC24:1) were obtained from Larodan Fine Chemicals. Methyl esters of C26:0 (meC26:0) and C26:1 (meC26:1) were prepared as described previously (23). Tunicamycin was obtained from Sigma Aldrich. Hexadecanoic-16,16,16-D<sub>3</sub> acid (D<sub>3</sub>-C16:0) and octadecanoic-17,17,18,18,18-D<sub>5</sub> acid (D<sub>5</sub>-C18:0) were obtained from CDN isotopes. TO901317 was obtained from Cayman Chemical. GW3965 and LXR623 were obtained from Sigma Aldrich. SCD1 inhibitor 1716 [4-(2-chlorophenoxy)-N-(3-(3-methylcarbamoyl)phenyl) piperidine-1-carboxamide] was obtained from BioVision. All chemicals were dissolved in DMSO (Sigma Aldrich). Antibodies against SCD1 (M38 #2438) and XBP1s (D2C1F) were obtained from Cell Signaling Technology. Antibody against beta-actin (A5441) was obtained from Sigma Aldrich and IRDye secondary antibodies were obtained from LI-COR Inc.

## Analysis of TO901317

Sample preparation was performed essentially as described with minor modifications (73). Briefly, a volume of tissue homogenate corresponding to 1 mg of protein was transferred into a 2 mL tube to which internal standards and 600 µL acetonitrile was added followed by vortex mixing for 3 min and centrifugation at 14,000 RPM for 10 minutes. The supernatant was transferred to a new tube and evaporated under a constant stream of nitrogen. The samples were then reconstituted in 100 µL water/methanol (40/60, v/v) and transferred to a sample vial and capped. Analysis of TO901317 was done using the metabolomics procedure as described by

Molenaars et al. using a Bruker trapped ion mobility-quadrupole time-of-flight mass spectrometer (timsTOF) (84). Identification of TO901317 was based on a combination of accurate mass, (relative) retention time and collisional cross section. Quantification of TO901317 was done by using tissue specific calibration curves. The calibration curve samples consisted of pooled tissue homogenates from untreated mice spiked with TO901317.

### **Liver histopathology**

For histopathological assessment of the liver following TO treatment, two to three cross-sections (1-1.5 mm thick) of the left liver lobe from each mouse were dissected at the treatment endpoint, immersion fixed in phosphate-buffered 4% paraformaldehyde for 48-72 h at 4°C, embedded in paraffin and stained with hematoxylin–eosin and PAS. Biopsies were blinded and semi-quantitatively scored by a pathologist (JYEL) using a scoring system for histopathologic classification of liver lesions (Bedossa et al. (84). Each biopsy was scored for the grade of steatosis (S0: <5%; S1: 5%-33%, mild; S2: 34%-66%, moderate; S3: >67%, marked), ballooning (0: normal; 1: presence of clusters of hepatocytes with a rounded shape and pale cytoplasm usually reticulated; 2: same as grade 1 with some enlarged hepatocytes, at least 2-fold that of normal cells), inflammation (a focus of two or more inflammatory cells within the lobule. Foci were counted at 20 magnification (0: none; 1: 2 foci per 20; 2: >2 foci per 20), and fibrosis (stage 0 (F0) none); stage 1 (F1): 1a or 1b perisinusoidal zone 3 or 1c portal fibrosis, stage 2 (F2): perisinusoidal and periportal fibrosis without bridging, stage 3 (F3): bridging fibrosis and stage 4 (F4): cirrhosis).

### **Immunoblotting**

XBP1s: fibroblasts were incubated with fatty acids as described previously (23). After 4 days of incubation with 60  $\mu$ M fatty acids or 1 day with 10  $\mu$ g/ml tunicamycin (positive control for XBP1s induction), cell pellets were prepared. Pellets were resuspended in PBS with protease inhibitor cocktail (Complete mini protease inhibitor cocktail, Roche) and homogenized by sonication with a needle on ice for 12 s at 7-8 Watt. Protein concentration was determined with the BCA assay using human serum albumin as standard. The protein samples were diluted in 5x Laemmli sample buffer and incubated at 95°C for 5 min. Aliquots of 25  $\mu$ g protein were loaded on a 10% SDS-PAGE running gel. After protein separation, proteins were transferred to a 0.45  $\mu$ m pore size nitrocellulose membrane. The membrane was incubated for 1 h with 5% (wt/vol) non-fat dried milk powder-TRIS buffered saline + 0.1% Tween-20 (TBST), followed by 2 h of incubation with rabbit anti-human XBP1s (D2C1F, Cell Signaling Technology) 1:1,000 in 5% non-fat dried milk powder-TBST. Next, the membrane was incubated for 1 h with IRDye goat-anti-rabbit 800CW (LI-COR Inc.) 1:10,000 in 5% non-fat dried milk powder-TBST + 0.01% (wt/vol) SDS.

SCD1: control and ALD fibroblasts were seeded at approximately 40% confluence. The next day, culture medium was replaced by culture medium containing LXR agonists or vehicle DMSO. After 3 days of incubation, cell pellets were harvested. Protein samples were prepared as described for the detection of XBP1s. The protein samples were diluted in 2x Laemmli sample buffer with 8 M urea and 40  $\mu$ g of protein was loaded on a 12.5% SDS-PAGE running gel. After protein separation, proteins were transferred to a nitrocellulose membrane with a pore size of 0.45  $\mu$ m. The membrane was incubated for 1 h with 5% (wt/vol) BSA in TBST followed by 2 hours of incubation with rabbit anti-human SCD1 (M38 #2438, Cell Signaling Technology) 1:1,000 in 5% BSA in TBST. Next, the membrane was incubated for 1 h with IRDye goat-anti-



rabbit 800CW (LI-COR Inc.) 1:10,000 in 5% BSA-TBST + 0.01% SDS. As a control for equal protein loading, the membranes were incubated with mouse monoclonal anti-beta-actin 1:20,000 (A5441 Sigma-Aldrich) in Odyssey blocking buffer (LI-COR):PBS + 0.1% Tween-20 (PBST) 1:1 for 30 min followed by incubation with IRDye donkey-anti-mouse RD680 1:10,000 (LI-COR) in Odyssey blocking buffer (LI-COR):PBST + 0.01% SDS 1:1 for 1 h. All incubations were performed at room temperature. Fluorescently labeled proteins were detected by LI-COR Odyssey.

1124 **Supplemental Figure 1.** Overview schematics of zebrafish behavior testing, primary  
1125 compound screen, and secondary screen.

1126

1127

1128

1129

1130

1131

1132

1133

1134

1135

1136

1137

1138

1139

1140

1141

1142

1143

1144

1145

1146

1147

1148

1149

1150

1151

1152

1153

1154

1155

1156

1157 **Supplemental Figure 2.** Results from zebrafish ALD mutant secondary screen. **A.** Motor  
1158 behavior results from individual animals, at 5, 6, and 7 dpf. Compound names along x-axis.

1159 WT, heterozygote, and sa509/+ indicated. **B.** Heat-map of results in A. **C.** Numbers of  
1160 animals tested for each compound.

1161

1162 **Supplemental Figure 3.** Liver histology in WT and Abcd1-deficient mice, at baseline, or  
1163 following 5 or 10 weeks of TO901317 administration. Assessment of histopathological liver  
1164 changes following TO treatment. The liver biopsy was formalin-fixed and paraffin-embedded.  
1165 Two to three serial sections stained with hematoxylin and eosin (H&E) and PAS. Biopsies  
1166 were blinded and semi-quantitatively scored by a pathologist (JYEL) using a scoring system  
1167 for histopathologic classification of liver lesions (described by Bedossa et al. (84)).

1168 **Top image:** Each biopsy was scored for the grade of steatosis (**A**) (S0: <5%; S1: 5%-33%,  
1169 mild; S2: 34%-66%, moderate; S3: >67%, marked), (**B**) ballooning (0: normal; 1: presence of  
1170 clusters of hepatocytes with a rounded shape and pale cytoplasm usually reticulated. Although  
1171 shape is different, size is quite similar to that of normal hepatocytes; 2: same as grade 1 with  
1172 some enlarged hepatocytes, at least 2-fold that of normal cells), (**C**) inflammation (a focus of  
1173 two or more inflammatory cells within the lobule. Foci were counted at 20 magnification (0:  
1174 none; 1: 2 foci per 20; 2: >2 foci per 20) and (**D**) fibrosis (stage 0 (F0) none); stage 1 (F1): 1a  
1175 or 1b perisinusoidal zone 3 or 1c portal fibrosis, stage 2 (F2): perisinusoidal and periportal  
1176 fibrosis without bridging, stage 3 (F3): bridging fibrosis and stage 4 (F4): cirrhosis).

1177 **Bottom image:** (x10 magnification) shows an example of a liver with stage 0 steatosis (less  
1178 than 5% steatosis) and stage 1 inflammation (2 foci of inflammatory cells in x20  
1179 magnification, magnified in insert 3). The steatosis (shown by empty fat drops in cytoplasm)  
1180 and grade 2 ballooning (reticulated cytoplasm with more than 2-fold enlarged cell size) of  
1181 hepatocytes are magnified in inserts 1 and 2, respectively. PAS stain showed no fibrosis.

1182

1183

1184

1185

1186

1187 **Supplemental Table 1.**

1188 Zebrafish ALD mutant primary behavior screen compounds and raw behavior results.

1189

1190

1191 **Supplemental Table 2.**

1192 Zebrafish ALD mutant primary behavior screen Z scores for each motor behavior parameter.

1193

1194

1195 **Supplemental Table 3.**

1196 Zebrafish ALD mutant primary behavior screen; listing of compounds composite Z scores for

1197 Z score > 1 standard deviation.

1198

1199

1200

A

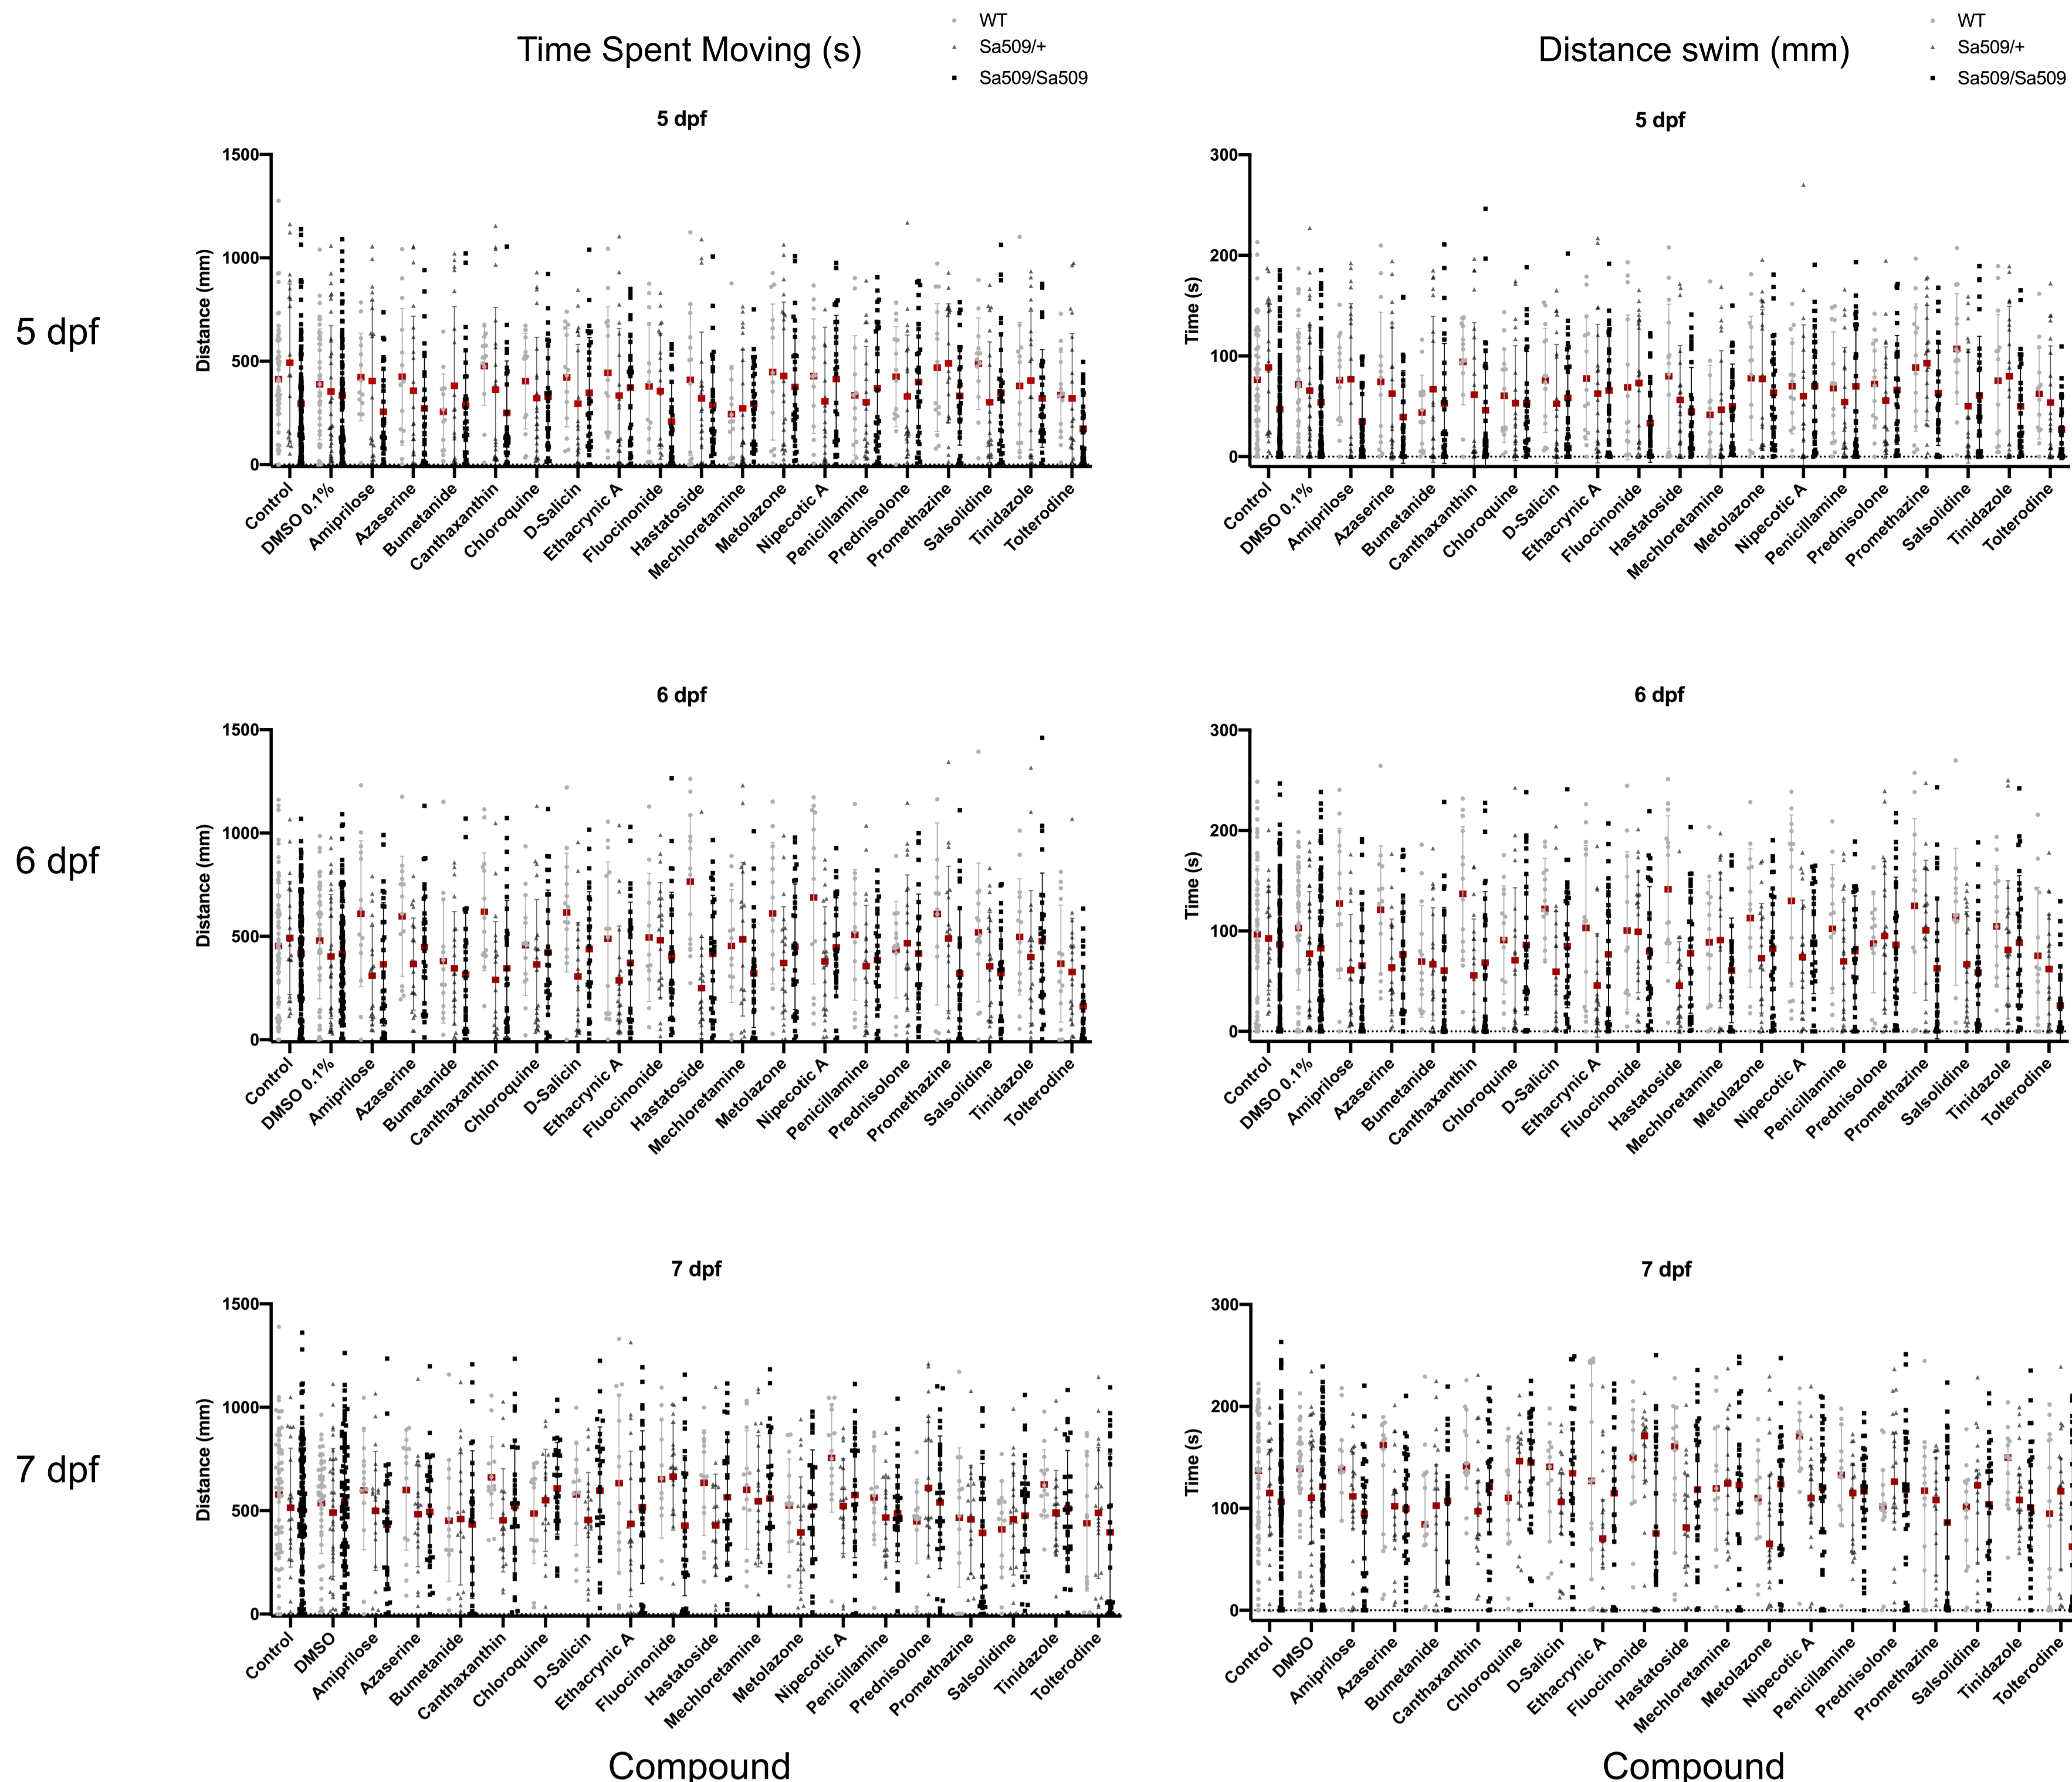

B

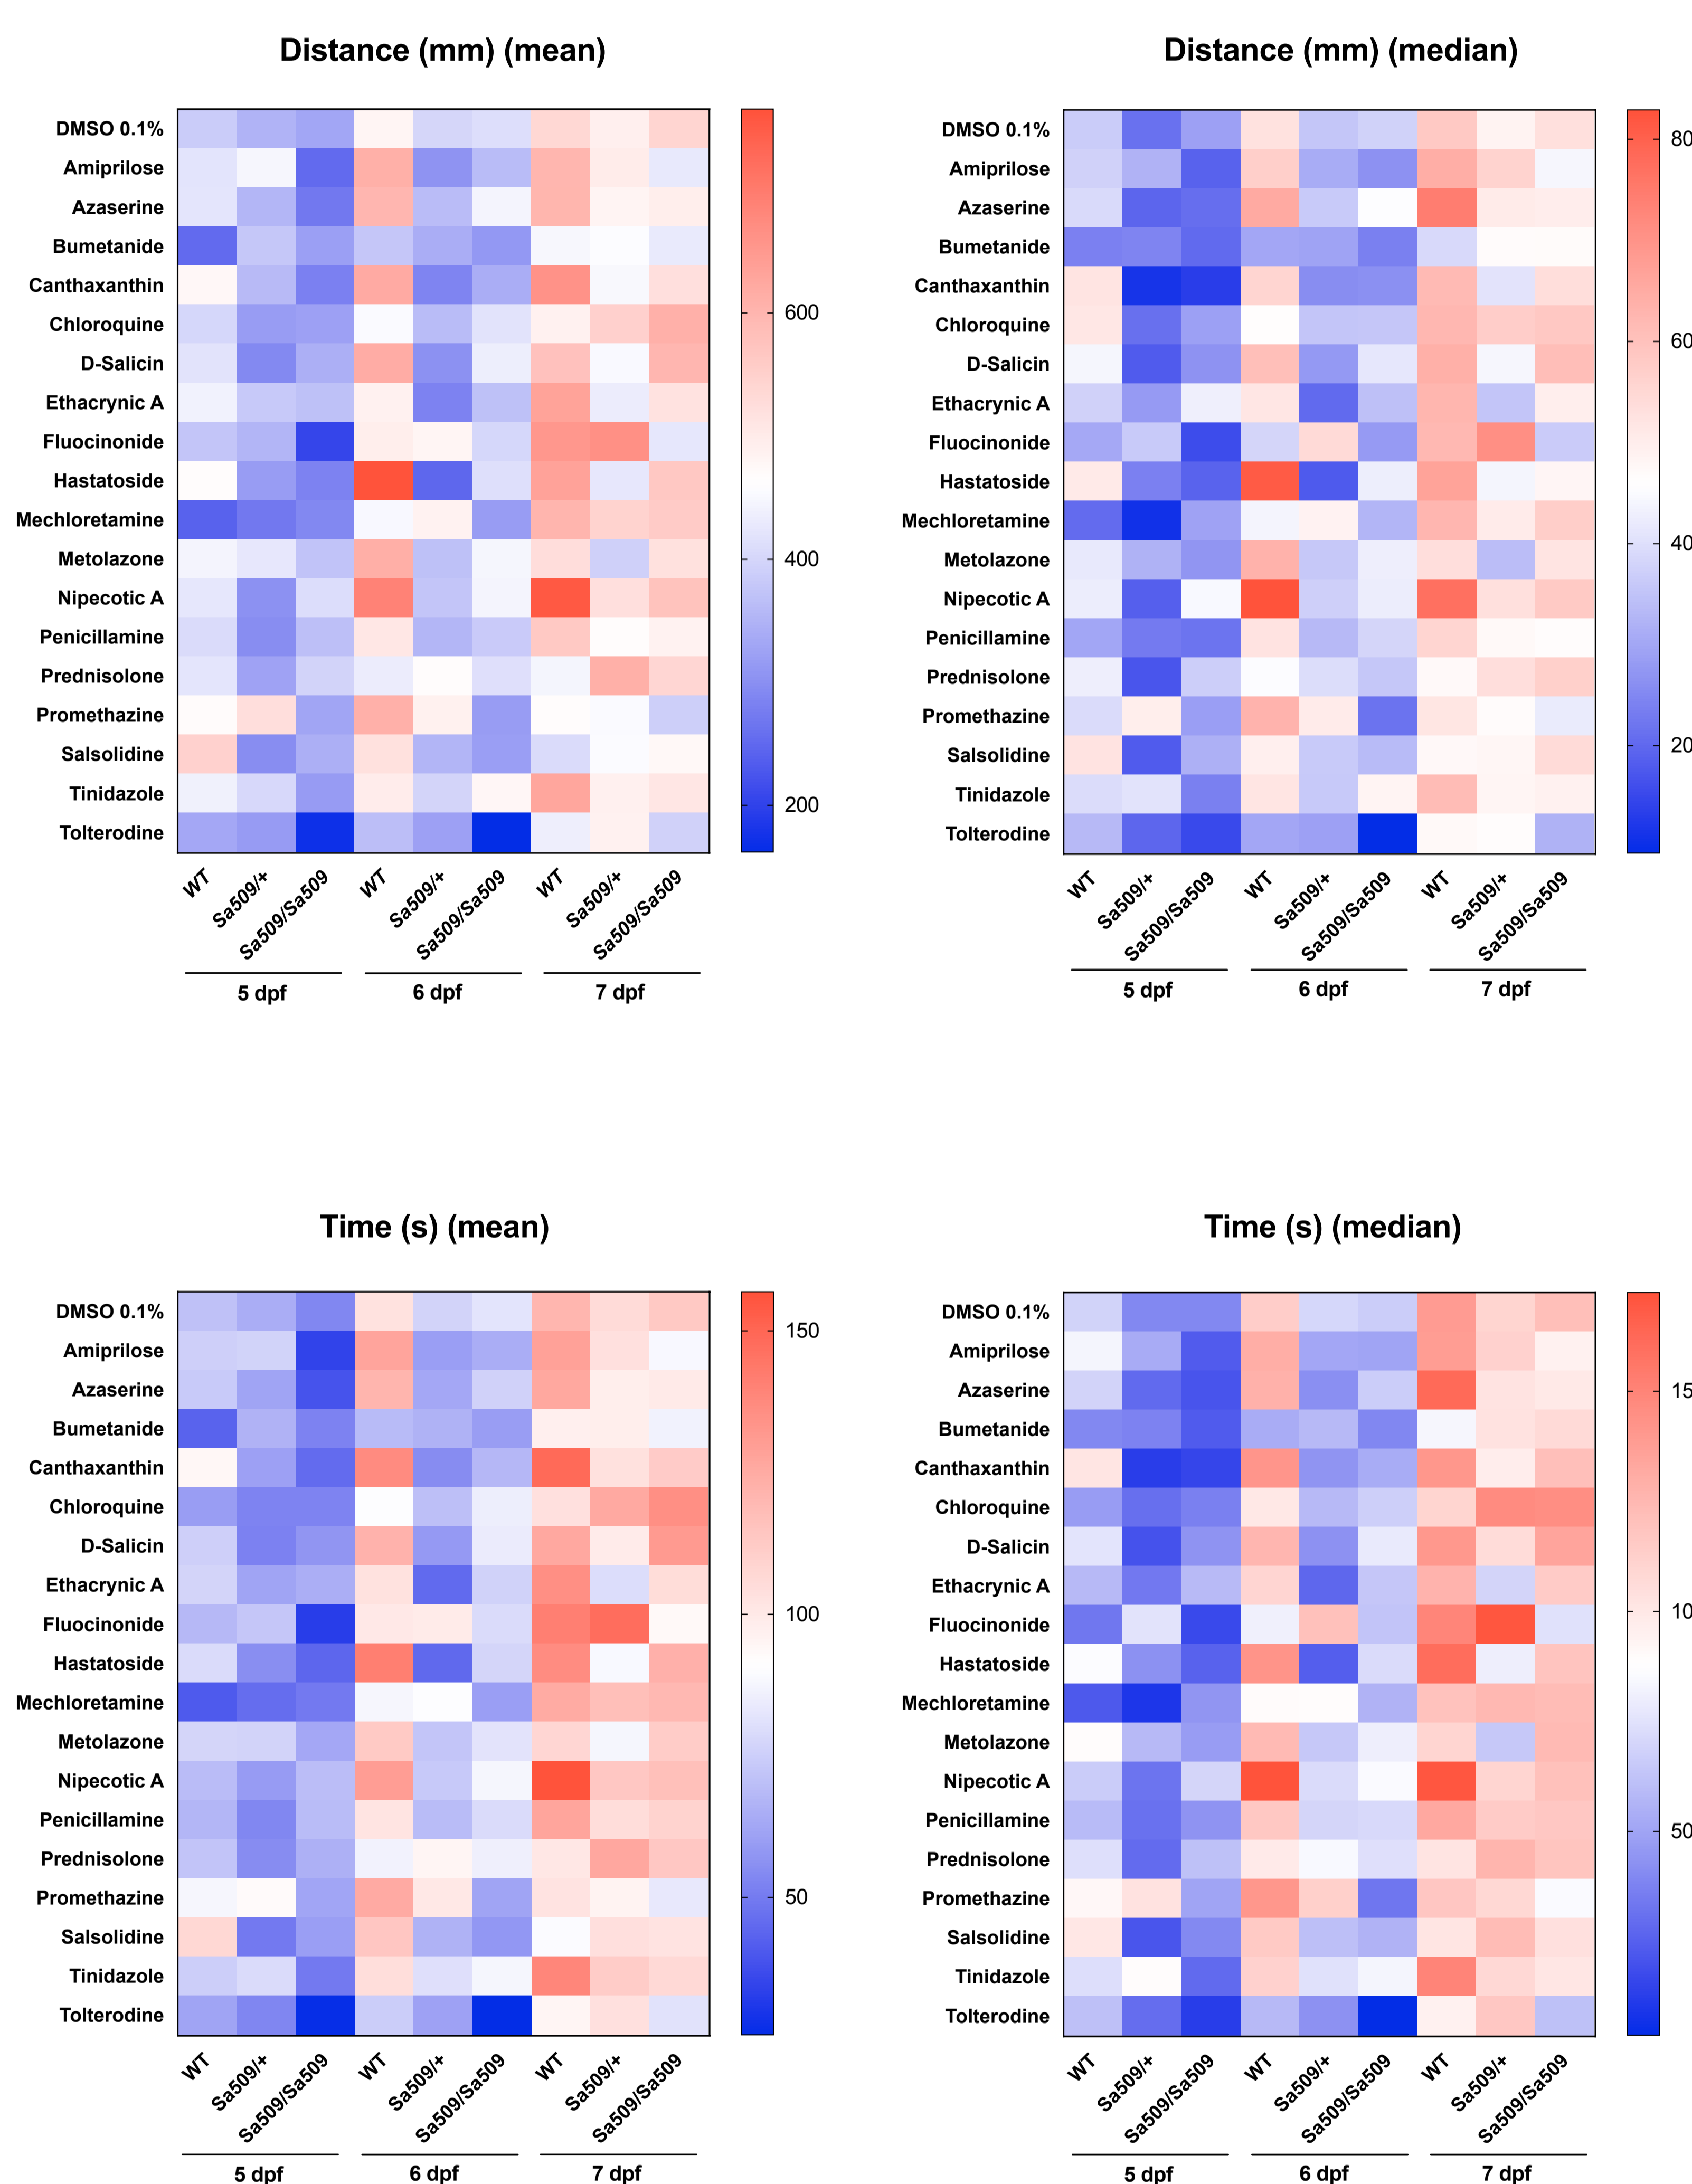

C

| n               | 5 dpf     |         |             | 6 dpf |         |             | 7 dpf |         |             |      |
|-----------------|-----------|---------|-------------|-------|---------|-------------|-------|---------|-------------|------|
|                 | WT        | Sa509/+ | Sa509/Sa509 | WT    | Sa509/+ | Sa509/Sa509 | WT    | Sa509/+ | Sa509/Sa509 |      |
|                 | DMSO 0.1% | 44      | 34          | 80    | 44      | 34          | 82    | 44      | 34          |      |
| Amiprilose      | 14        | 21      | 30          | 14    | 22      | 30          | 14    | 22      | 30          | 197  |
| Azaserine       | 14        | 22      | 30          | 14    | 21      | 29          | 14    | 22      | 30          | 196  |
| Bumetanide      | 14        | 20      | 30          | 14    | 22      | 29          | 14    | 22      | 29          | 194  |
| Canthaxanthin   | 14        | 22      | 30          | 14    | 22      | 30          | 14    | 20      | 29          | 195  |
| Chloroquine     | 14        | 22      | 30          | 14    | 22      | 30          | 14    | 19      | 29          | 194  |
| D-Salicin       | 14        | 22      | 30          | 14    | 22      | 30          | 13    | 22      | 30          | 197  |
| Ethacrynic A    | 14        | 22      | 30          | 14    | 22      | 30          | 14    | 22      | 29          | 197  |
| Fluciclonide    | 14        | 22      | 30          | 12    | 22      | 29          | 12    | 21      | 29          | 191  |
| Hastatoside     | 14        | 22      | 30          | 14    | 21      | 30          | 14    | 21      | 29          | 195  |
| Mechlorethamine | 14        | 22      | 29          | 14    | 20      | 30          | 13    | 21      | 28          | 191  |
| Metolazone      | 14        | 22      | 30          | 14    | 22      | 30          | 14    | 22      | 29          | 197  |
| Nipecotic A     | 14        | 20      | 30          | 14    | 22      | 29          | 14    | 22      | 29          | 194  |
| Penicillamine   | 14        | 22      | 30          | 13    | 22      | 29          | 14    | 22      | 30          | 196  |
| Prednisolone    | 14        | 22      | 30          | 14    | 22      | 30          | 14    | 22      | 30          | 198  |
| Promethazine    | 14        | 21      | 30          | 13    | 20      | 28          | 14    | 18      | 27          | 185  |
| Salsolidine     | 14        | 22      | 30          | 14    | 22      | 29          | 14    | 22      | 29          | 196  |
| Tinidazole      | 14        | 21      | 30          | 14    | 22      | 30          | 14    | 22      | 29          | 196  |
| Tolterodine     | 14        | 22      | 29          | 14    | 21      | 30          | 14    | 21      | 28          | 193  |
|                 | 296       | 423     | 618         | 292   | 423     | 614         | 292   | 417     | 603         | 3978 |



# Supplemental Figure 1

## A

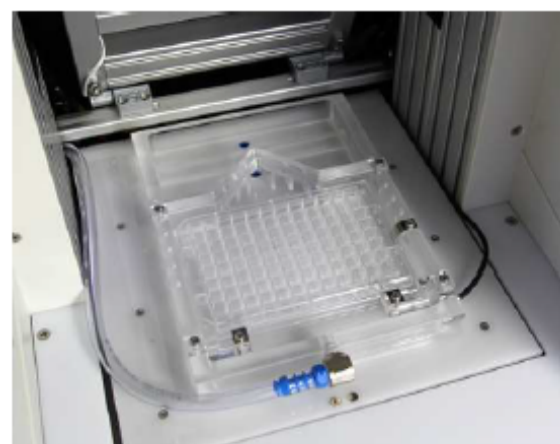

96-well tray holder

### Screen hardware

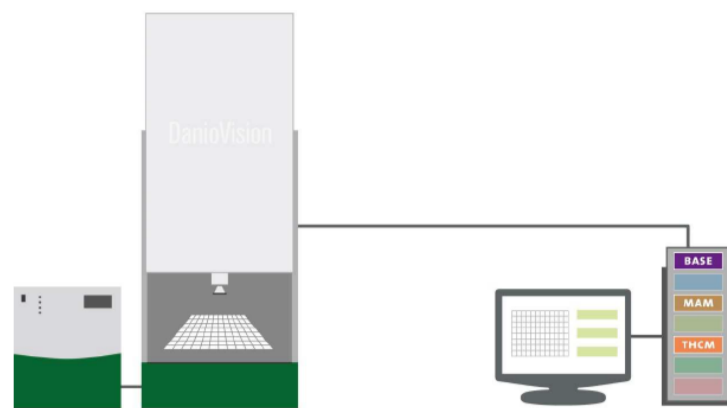

data flow

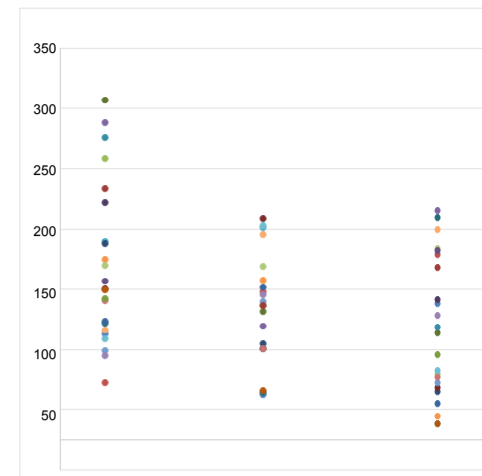

data output

## B

### Primary Screen

2538 compounds  
Single dose (10 $\mu$ M)  
Groups of four drugs  
12 animals/drug group

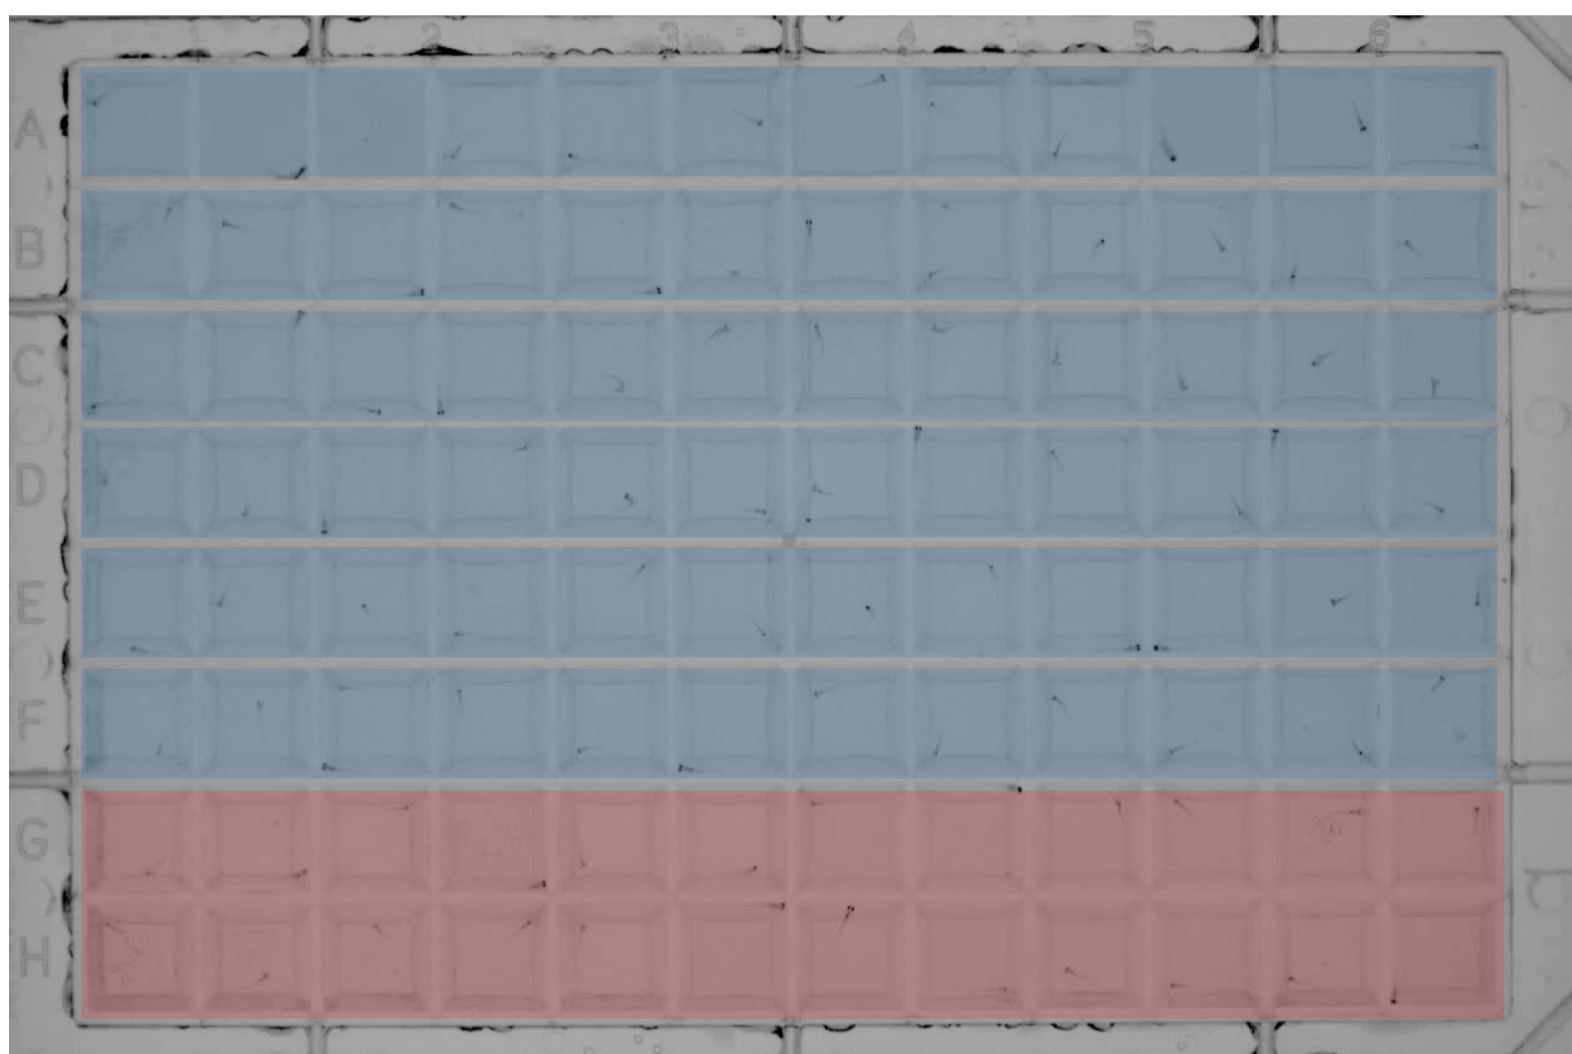

Drug 1-4  
Drug 5-8  
Drug 9-12  
Drug 13-16  
Drug 17-20  
Drug 21-24  
DMSO  
Control

## C

### Secondary Screen

15 compounds > 1 S.D.  
Single dose (2.5 $\mu$ M)  
Single drug  
48 animals/drug

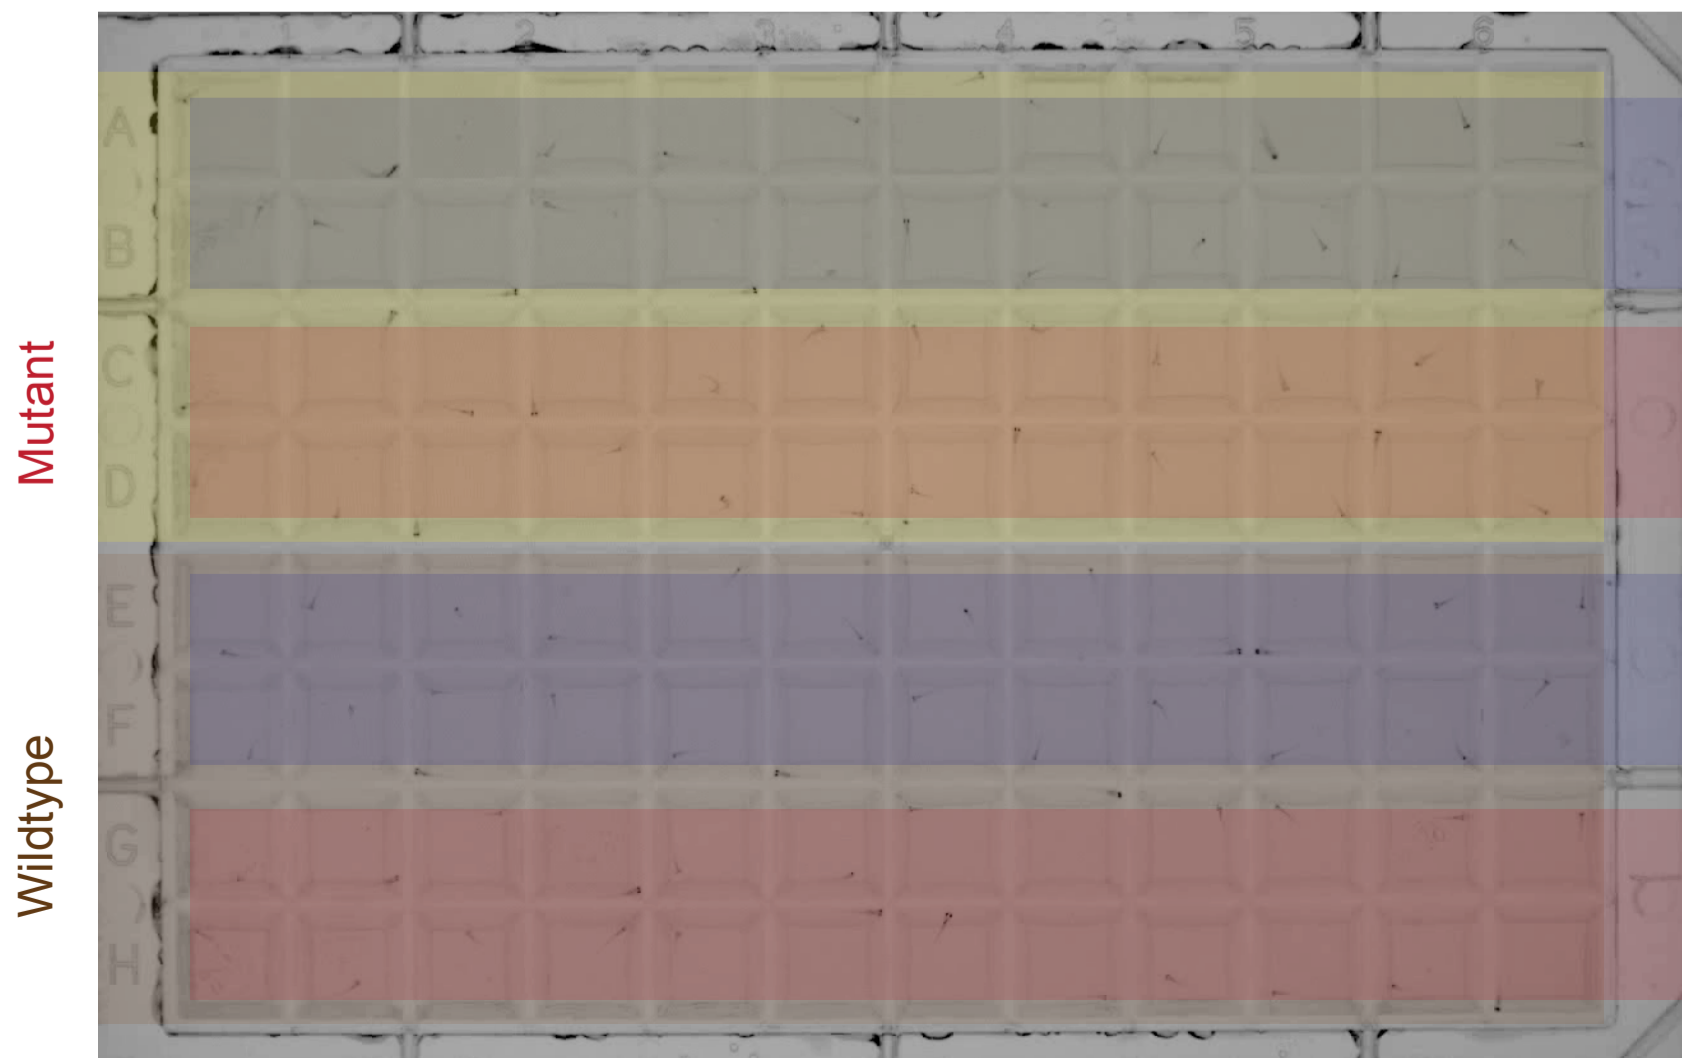

Mutant

Wildtype

Drug  
DMSO  
Control  
Drug  
DMSO  
Control

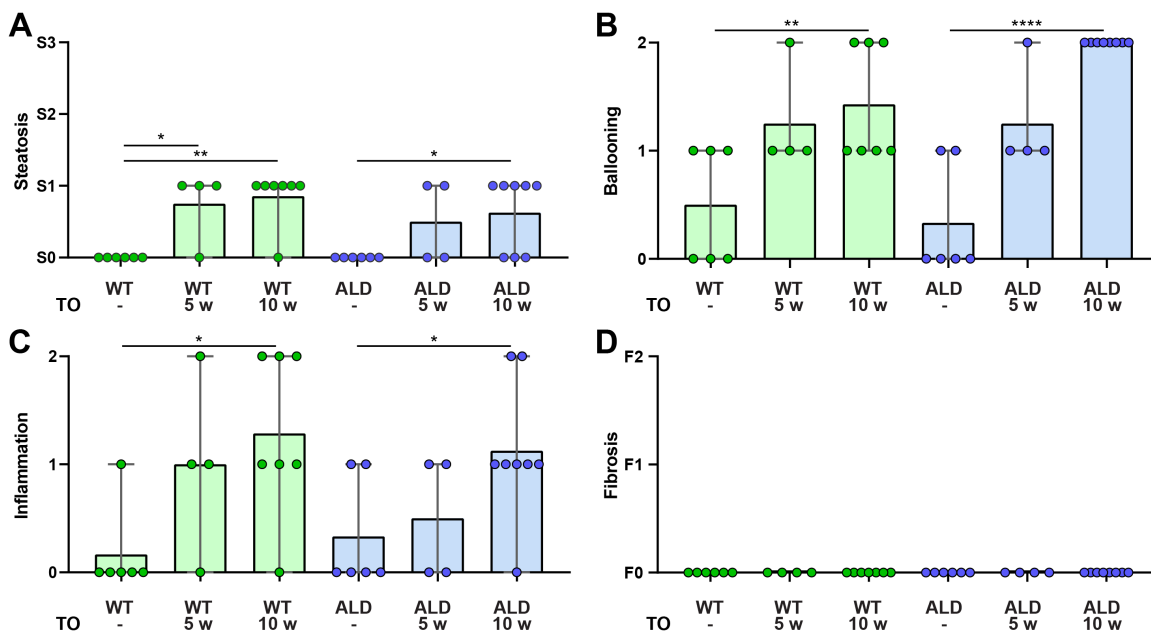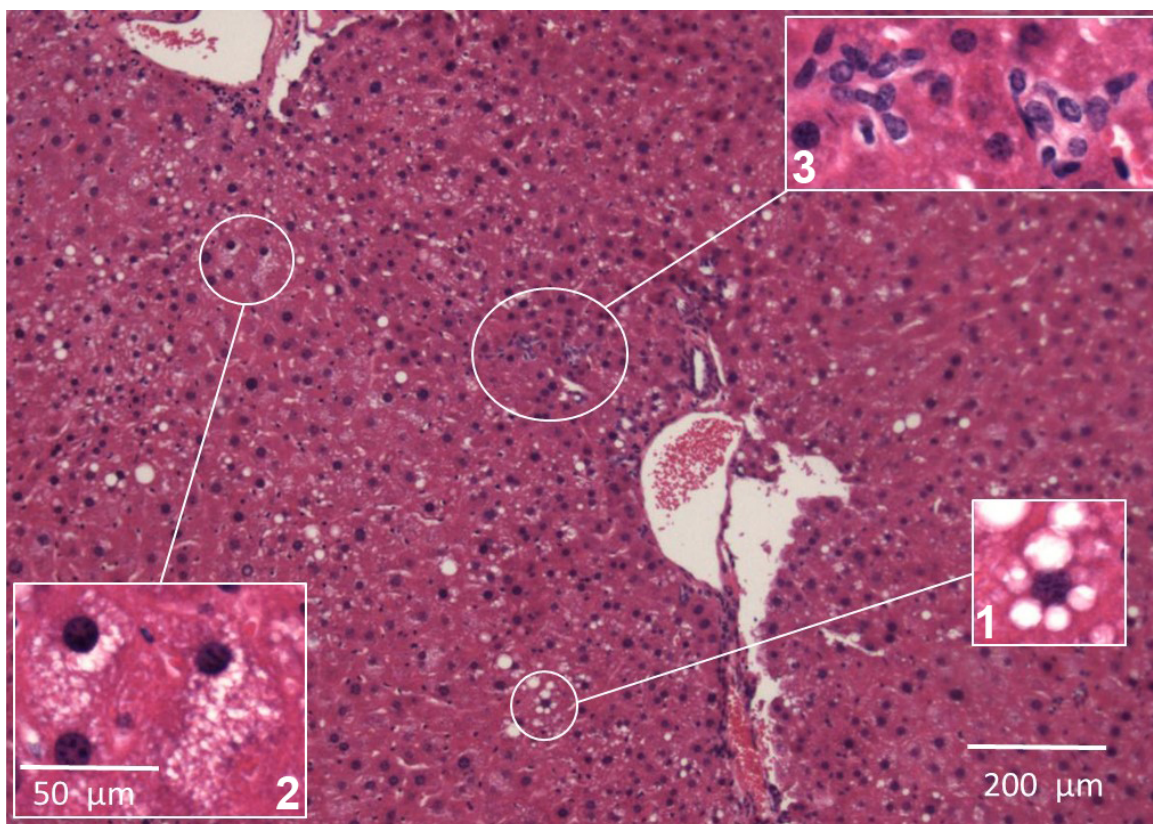

**Supplemental figure 3:** Assessment of histopathological liver changes following TO treatment. The liver biopsy was formalin-fixed and paraffin-embedded. Two to three serial sections stained with hematoxylin and eosin (H&E) and PAS. Biopsies were blinded and semi-quantitatively scored by a pathologist (JYEL) using a scoring system for histopathologic classification of liver lesions (Bedossa et al. (2012) *Hepatology* 56(5):1751-9).

**Top image:** Each biopsy was scored for the grade of steatosis (A) (S0: <5%; S1: 5%-33%, mild; S2: 34%-66%, moderate; S3: >67%, marked), (B) ballooning (0: normal; 1: presence of clusters of hepatocytes with a rounded shape and pale cytoplasm usually reticulated. Although shape is different, size is quite similar to that of normal hepatocytes; 2: same as grade 1 with some enlarged hepatocytes, at least 2-fold that of normal cells), (C) inflammation (a focus of two or more inflammatory cells within the lobule. Foci were counted at 20 magnification (0: none; 1: 2 foci per 20; 2: >2 foci per 20)) and (D) fibrosis (stage 0 (F0) none); stage 1 (F1): 1a or 1b perisinusoidal zone 3 or 1c portal fibrosis, stage 2 (F2): perisinusoidal and periportal fibrosis without bridging, stage 3 (F3): bridging fibrosis and stage 4 (F4): cirrhosis).

**Bottom image:** (x10 magnification) shows an example of a liver with stage 0 steatosis (less than 5% steatosis) and stage 1 inflammation (2 foci of inflammatory cells in x20 magnification, magnified in insert 3). The steatosis (shown by empty fat drops in cytoplasm) and grade 2 ballooning (reticulated cytoplasm with more than 2-fold enlarged cell size) of hepatocytes are magnified in inserts 1 and 2, respectively. PAS stain showed no fibrosis.
